# Supplementary material for: Association between Ambient Temperature and Nonaccidental Mortality in Liuzhou, China: A TimeSeries Study, 2014–2024
Source: Research Square preprint supplement (doi:10.21203/rs.3.rs-8346096/v1), 2026-02-11
Supplement: Supplementary file 1 [file 4eaf5afc386412fe1b40e88a.docx]

**Supplementary table 2.** The attributable numbers to mild and extreme non-optimal temperature with 95% empirical confidence interval (95% CI).

| Groups |  | **Extreme cold** |  | **Mild cold** |  | **Mild heat** |  | **Extreme heat** |
| --- | --- | --- | --- | --- | --- | --- | --- | --- |
| Overall |  | 1808(1303,2298) |  | 14569(9258,20135) |  | 4825(1453,8112) |  | 524(275,763) |
| Respiratory disease | | 199('-38,389) |  | 1080('-1616,3226) |  | 1154(550,1721) |  | 132(67,195) |
| Cardiovascular disease | | 1066(665,1396) |  | 9367(4057,13891) |  | 2021(975,2940) |  | 223(124,319) |
| male |  | 1260(796,1657) |  | 11136(4769,16764) |  | 2552(1324,3761) |  | 269(143,398) |
| female |  | 444(246,633) |  | 1869('-92,3532) |  | 1137('-4035,5931) |  | 219('-1,417) |
| ≥65 years | | 1240(609,1836) |  | 8488(315,16118) |  | 4418(2450,6263) |  | 516(387,641) |
| 0-64 years | | 599(209,875) |  | 8336('-1944,15739) |  | 0(0,0) |  | 30('-38,85) |

**Note:** extreme cold (<6 °C), mild cold (6 °C to MMT), mild heat (MMT to 31 °C), and extreme heat (>31 °C)
