# Supplementary material for: Association between Ambient Temperature and Nonaccidental Mortality in Liuzhou, China: A TimeSeries Study, 2014–2024
Source: Research Square preprint supplement (doi:10.21203/rs.3.rs-8346096/v1), 2026-02-11
Supplement: Supplementary file 2 [file 7dd8a2c8595cd4d1b7fe9600.docx]

**Supplementary table 1.** The attributable fractions to mild and extreme non-optimal temperature with 95% empirical confidence interval (95% CI)

| Groups |  | **Extreme cold (%)** |  | **Mild cold (%)** |  | **Mild heat (%)** |  | **Extreme heat (%)** |
| --- | --- | --- | --- | --- | --- | --- | --- | --- |
| Overall |  | 0.81(0.58,1.02) |  | 6.50(4.13,8.98) |  | 2.15(0.65,3.62) |  | 0.23(0.12,0.34) |
| Respiratory disease | | 0.81('-0.16,1.59) |  | 4.42('-6.62,13.22) |  | 4.73(2.25,7.05) |  | 0.54(0.27,0.80) |
| Cardiovascular disease | | 1.11(0.69,1.45) |  | 9.72(4.21,14.41) |  | 2.10(1.01,3.05) |  | 0.23(0.13,0.33) |
| male |  | 0.94(0.59,1.24) |  | 8.32(3.56,12.53) |  | 1.91(0.99,2.81) |  | 0.20(0.11,0.30) |
| female |  | 0.49(0.27,0.70) |  | 2.07('-0.10,3.91) |  | 1.26('-4.46,6.56) |  | 0.24(0,0.46) |
| ≥65 years | | 0.76(0.37,1.12) |  | 5.18(0.19,9.82) |  | 2.69(1.49,3.82) |  | 0.31(0.24,0.39) |
| 0-64 years | | 1.00(0.35,1.46) |  | 13.89('-3.24,26.22) |  | 0(0,0) |  | 0.05('-0.06,0.14) |

**Note:** extreme cold (<6 °C), mild cold (6 °C to MMT), mild heat (MMT to 31 °C), and extreme heat (>31 °C)
