# Supplementary material for: Association between Ambient Temperature and Nonaccidental Mortality in Liuzhou, China: A TimeSeries Study, 2014–2024
Source: Research Square preprint supplement (doi:10.21203/rs.3.rs-8346096/v1), 2026-02-11
Supplement: Supplementary file 3 [file b28f393841b4f4976c667d4b.docx]

**Supplementary table 3.** The influence of changing the covariate degree of freedom (df) on the research results

| Groups |  | **The minimum mortality temperature (°C)** |  | **Extreme low temperature (%)** |  | **Extreme high temperature (%)** |
| --- | --- | --- | --- | --- | --- | --- |
| Time df |  |  |  |  |  |  |
| 7 |  | 23.5 |  | 1.593(1.446,1.756) |  | 1.206(1.058,1.374) |
| 9 |  | 24 |  | 1.491(1.319,1.686) |  | 1.265(1.101,1.454) |
| Humidity df | |  |  |  |  |  |
| 2 |  | 23.5 |  | 1.481(1.324,1.655) |  | 1.215(1.063,1.389) |
| 4 |  | 23.5 |  | 1.480(1.324,1.655) |  | 1.220(1.067,1.395) |
| 5 |  | 23.5 |  | 1.480(1.324,1.655) |  | 1.220(1.067,1.395) |
| SO2 df |  |  |  |  |  |  |
| 2 |  | 23.5 |  | 1.472(1.318,1.643) |  | 1.194(1.044,1.365) |
| 4 |  | 23.5 |  | 1.472(1.318,1.643) |  | 1.194(1.044,1.365) |
| 5 |  | 23.5 |  | 1.472(1.318,1.643) |  | 1.194(1.044,1.365) |
| O3 df |  |  |  |  |  |  |
| 2 |  | 23.5 |  | 1.480(1.326,1.652) |  | 1.184(1.034,1.355) |
| 4 |  | 23.5 |  | 1.482(1.328,1.655) |  | 1.187(1.036,1.358) |
| 5 |  | 23.5 |  | 1.482(1.328,1.655) |  | 1.187(1.036,1.358) |

**Note:** Extreme Low and extreme High were defined as temperatures below the 2.5th percentile and above the 97.5th percentile of the temperature distribution
